# Supplementary material for: Understanding the facet effects of heterogeneous Rh2P catalysts for styrene hydroformylation
Source: Royal Society of Chemistry journal article supplement (doi:10.1039/d2cy00974a), 2022-01-01
Supplement: d2cy00974a1.pdf [file d2cy00974a1.pdf]

## Supporting Information

# Understanding the Facet Effects of Heterogeneous Rh<sub>2</sub>P Catalysts for Styrene Hydroformylation

*Boyang Liu, Yu Wang, Shaoxiong Liu, Zhenyu Kang, Xiaocheng Lan, Tiefeng Wang\**

<sup>a</sup> Beijing Key Laboratory of Green Reaction Engineering and Technology

Department of Chemical Engineering, Tsinghua University, Beijing 100084, China

\*Corresponding author: Tiefeng Wang, [wangtf@tsinghua.edu.cn](mailto:wangtf@tsinghua.edu.cn)

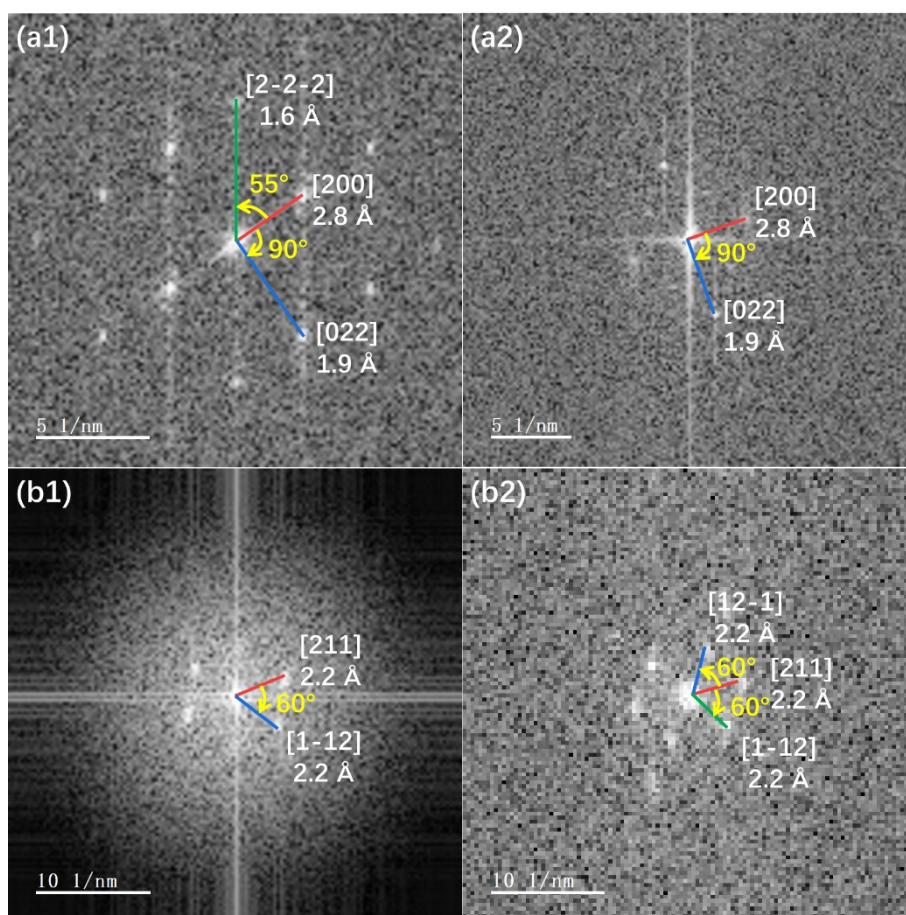

**Figure S1.** Fast Fourier transition (FFT) patterns of Rh<sub>2</sub>P/SiO<sub>2</sub> catalysts with Rh<sub>2</sub>P (110) facet (a) and Rh<sub>2</sub>P (111) facet (b).

**Table S1.** Energetics (eV) of surface reactions on Rh<sub>2</sub>P (111), Rh<sub>2</sub>P (110) and Rh<sub>2</sub>P (100) surfaces.

| ID               | Rh <sub>2</sub> P (111) |                                     |                        | Rh <sub>2</sub> P (110) |                                     |                        | Rh <sub>2</sub> P (100) |                                     |                        |
|------------------|-------------------------|-------------------------------------|------------------------|-------------------------|-------------------------------------|------------------------|-------------------------|-------------------------------------|------------------------|
|                  | Energy (eV)             | Gibbs free energy (eV) <sup>a</sup> | Activation energy (eV) | Energy (eV)             | Gibbs free energy (eV) <sup>a</sup> | Activation energy (eV) | Energy (eV)             | Gibbs free energy (eV) <sup>a</sup> | Activation energy (eV) |
| SS0              | 0.00                    | 0.00                                |                        | 0.00                    | 0.00                                |                        | 0.00                    | 0.00                                |                        |
| SS1              | -2.18                   | -1.17                               |                        | -2.53                   | -1.48                               |                        | -4.96                   | -3.83                               |                        |
| TS <sub>1</sub>  | -1.81                   | -0.78                               | 0.39                   | -1.94                   | -0.89                               | 0.59                   | -4.25                   | -3.12                               | 0.71                   |
| SS <sub>2</sub>  | -2.42                   | -1.28                               |                        | -2.16                   | -1.04                               |                        | -4.62                   | -3.38                               |                        |
| SS <sub>3</sub>  | -2.76                   | -1.06                               |                        | -3.93                   | -2.27                               |                        | -6.45                   | -4.60                               |                        |
| TS <sub>2</sub>  | -2.49                   | -0.80                               | 0.26                   | -2.80                   | -1.06                               | 1.21                   | -4.87                   | -3.06                               | 1.54                   |
| SS <sub>4</sub>  | -3.36                   | -1.62                               |                        | -3.59                   | -1.80                               |                        | -5.83                   | -3.99                               |                        |
| TS <sub>3</sub>  | -2.62                   | -0.91                               | 0.70                   | -2.79                   | -1.07                               | 0.73                   | -5.36                   | -3.50                               | 0.49                   |
| SS <sub>5</sub>  | -3.25                   | -1.37                               |                        | -3.36                   | -1.56                               |                        | -5.60                   | -3.63                               |                        |
| TS <sub>b1</sub> | -1.77                   | -0.80                               | 0.37                   | -1.99                   | -0.92                               | 0.56                   | -4.19                   | -3.06                               | 0.77                   |
| SS <sub>b2</sub> | -2.48                   | -1.36                               |                        | -2.87                   | -1.72                               |                        | -4.85                   | -3.64                               |                        |
| SS <sub>b3</sub> | -2.99                   | -1.25                               |                        | -4.36                   | -2.69                               |                        | -6.78                   | -4.98                               |                        |
| TS <sub>b2</sub> | -2.74                   | -1.02                               | 0.23                   | -2.70                   | -0.98                               | 1.71                   | -5.53                   | -3.75                               | 1.23                   |
| SS <sub>b4</sub> | -3.68                   | -1.93                               |                        | -3.56                   | -1.80                               |                        | -6.08                   | -4.25                               |                        |
| TS <sub>b3</sub> | -2.88                   | -1.12                               | 0.81                   | -2.23                   | -0.45                               | 1.35                   | -5.24                   | -3.41                               | 0.84                   |
| SS <sub>b5</sub> | -3.26                   | -1.35                               |                        | -3.07                   | -1.25                               |                        | -5.47                   | -3.54                               |                        |

<sup>a</sup> Thermal corrections were conducted under 80 °C and 3 MPa of syngas.

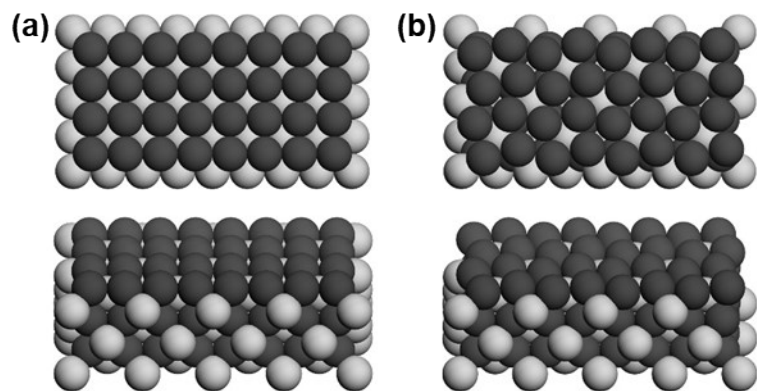

**Figure S2.** Blank Rh<sub>2</sub>P (100) surface before (a) and after (b) reconstruction. Rh and P atoms are marked by dark gray and light gray, respectively.

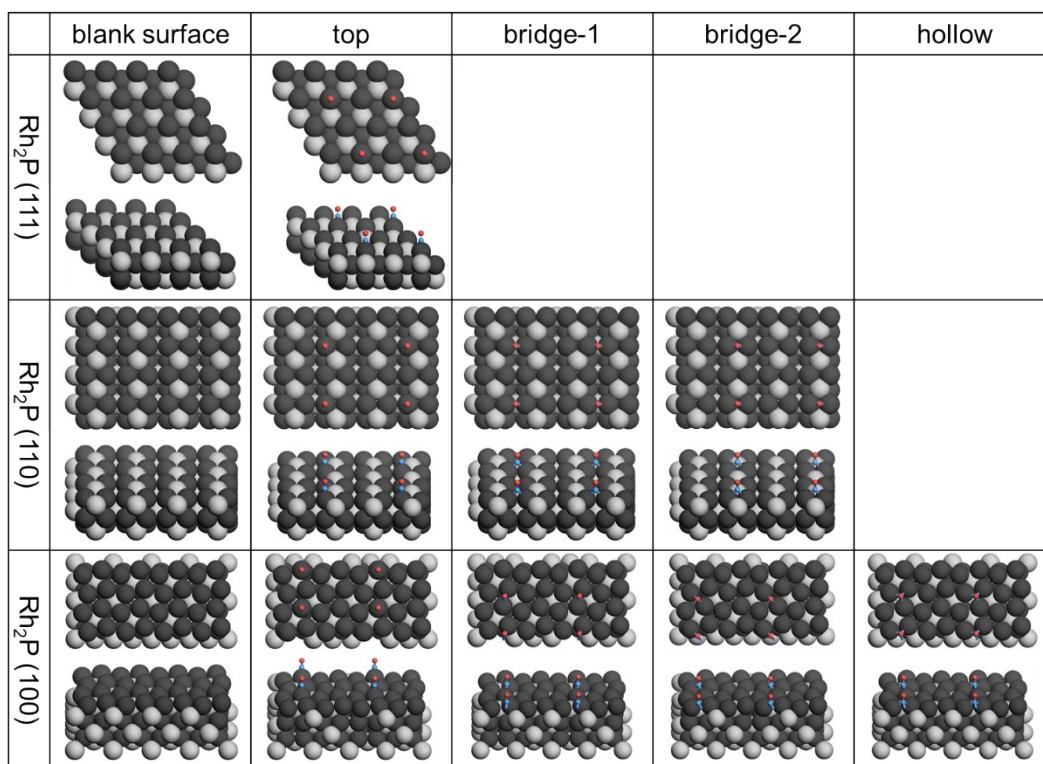

**Figure S3.** CO adsorption geometries on different  $\text{Rh}_2\text{P}$  facets. The Rh, P, C, O atoms were marked by dark gray, light gray, blue and red, respectively.

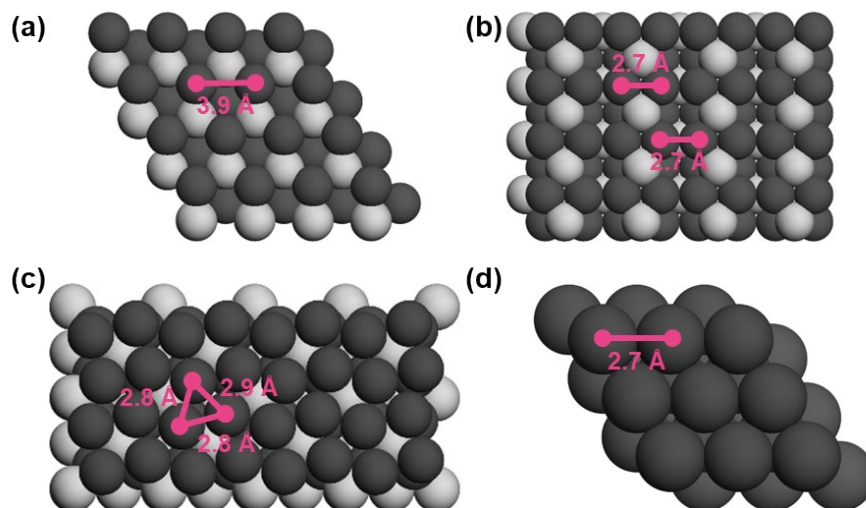

**Figure S4.** The distance between adjacent Rh atoms on Rh<sub>2</sub>P (111) (a), Rh<sub>2</sub>P (110) (b), Rh<sub>2</sub>P (100) (c) and Rh (111) (d) facets. The Rh, P, C, O atoms were marked by dark gray, light gray, blue and red, respectively.

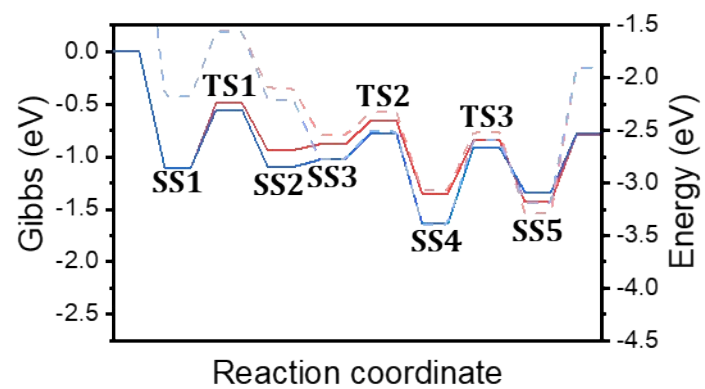

**Figure S5.** Gibbs free energy of styrene hydroformylation on Rh<sub>7</sub>Pd<sub>1</sub>P<sub>4</sub> (111). The total energy profiles are shown in dashed lines, while the Gibbs free energy at 80 °C and 3 MPa is shown in solid lines.

**Table S2.** Energetics (eV) of surface reactions on Rh<sub>7</sub>Pd<sub>1</sub>P<sub>4</sub> (111) surfaces.

| ID                | Rh <sub>7</sub> Pd <sub>1</sub> P <sub>4</sub> (111) |                                     |                        |                                                     |
|-------------------|------------------------------------------------------|-------------------------------------|------------------------|-----------------------------------------------------|
|                   | Energy (eV)                                          | Gibbs free energy (eV) <sup>a</sup> | Activation energy (eV) | TDI / TDTS                                          |
| SS0               | 0.00                                                 | 0.00                                |                        |                                                     |
| SS1               | -2.18                                                | -1.11                               |                        |                                                     |
| TS <sub>l</sub> 1 | -1.56                                                | -0.49                               | 0.62                   | TDTS <sub>l</sub><br>$\delta E_l = 1.15 \text{ eV}$ |
| SS <sub>l</sub> 2 | -2.10                                                | -0.94                               |                        |                                                     |
| SS <sub>l</sub> 3 | -2.55                                                | -0.88                               |                        |                                                     |
| TS <sub>l</sub> 2 | -2.33                                                | -0.66                               | 0.22                   |                                                     |
| SS <sub>l</sub> 4 | -3.07                                                | -1.35                               |                        |                                                     |
| TS <sub>l</sub> 3 | -2.51                                                | -0.84                               | 0.51                   |                                                     |
| SS <sub>l</sub> 5 | -3.29                                                | -1.43                               |                        |                                                     |
| TS <sub>b</sub> 1 | -1.56                                                | -0.55                               | 0.56                   |                                                     |
| SS <sub>b</sub> 2 | -2.21                                                | -1.10                               |                        |                                                     |
| SS <sub>b</sub> 3 | -2.78                                                | -1.03                               |                        |                                                     |
| TS <sub>b</sub> 2 | -2.50                                                | -0.78                               | 0.25                   |                                                     |
| SS <sub>b</sub> 4 | -3.39                                                | -1.64                               |                        | TDI                                                 |
| TS <sub>b</sub> 3 | -2.59                                                | -0.91                               | 0.73                   | TDTS <sub>b</sub><br>$\delta E_b = 0.73 \text{ eV}$ |
| SS <sub>b</sub> 5 | -3.19                                                | -1.34                               |                        |                                                     |

<sup>a</sup> Thermal corrections were conducted under 80 °C and 3 MPa of syngas.



$$\delta E = \begin{cases} E_{TDTS} - E_{TDI}, & \text{if TDTS appears after TDI} \\ E_{TDTS} - E_{TDI} + \Delta G_r, & \text{if TDTS appears before TDI} \end{cases}$$

Where,  $\Delta G_r$  is the energy of the reaction.

The TDTS was determined by maximizing the value of  $\delta E$ .

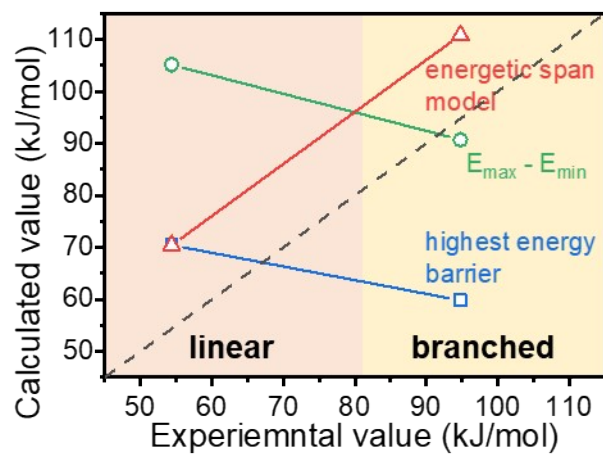

**Figure S6.** Experimental value and calculated value of apparent activation energies on Rh<sub>7</sub>Pd<sub>1</sub>P<sub>4</sub> (111).
